# Supplementary material for: LncRNA CBR3-AS1 regulates of breast cancer drug sensitivity as a competing endogenous RNA through the JNK1/MEK4-mediated MAPK signal pathway
Source: J Exp Clin Cancer Res. 2021 Jan 25;40:41. doi: 10.1186/s13046-021-01844-7 (PMC7830819; doi:10.1186/s13046-021-01844-7)
Supplement: Supplementary file 6 — Additional file 6: Table S3. The mRNAs banding to miR-25-3p. [file 13046_2021_1844_MOESM6_ESM.xlsx]

## Sheet: Sheet1
Table S3. The mRNAs banding to miR-25-3p
Target Detail	Target Rank	Target Score	miRNA Name	Gene Symbol	Gene Description
Details	1	100	hsa-miR-25-3p	CD69	CD69 molecule
Details	2	100	hsa-miR-25-3p	SLC12A5	solute carrier family 12 member 5
Details	3	100	hsa-miR-25-3p	MAN2A1	mannosidase alpha class 2A member 1
Details	4	100	hsa-miR-25-3p	G3BP2	G3BP stress granule assembly factor 2
Details	5	100	hsa-miR-25-3p	FBXW7	F-box and WD repeat domain containing 7
Details	6	99	hsa-miR-25-3p	PIKFYVE	phosphoinositide kinase, FYVE-type zinc finger containing
Details	7	99	hsa-miR-25-3p	MAP2K4	mitogen-activated protein kinase kinase 4
Details	8	99	hsa-miR-25-3p	B3GALT2	beta-1,3-galactosyltransferase 2
Details	9	99	hsa-miR-25-3p	FNIP1	folliculin interacting protein 1
Details	10	99	hsa-miR-25-3p	SLC17A6	solute carrier family 17 member 6
Details	11	99	hsa-miR-25-3p	RAB23	RAB23, member RAS oncogene family
Details	12	99	hsa-miR-25-3p	HIPK3	homeodomain interacting protein kinase 3
Details	13	99	hsa-miR-25-3p	MYO1B	myosin IB
Details	14	98	hsa-miR-25-3p	RIC1	RIC1 homolog, RAB6A GEF complex partner 1
Details	15	98	hsa-miR-25-3p	KLF4	Kruppel like factor 4
Details	16	98	hsa-miR-25-3p	ITGAV	integrin subunit alpha V
Details	17	98	hsa-miR-25-3p	FBN1	fibrillin 1
Details	18	98	hsa-miR-25-3p	DOCK9	dedicator of cytokinesis 9
Details	19	98	hsa-miR-25-3p	C21orf91	chromosome 21 open reading frame 91
Details	20	98	hsa-miR-25-3p	GLRA1	glycine receptor alpha 1
Details	21	98	hsa-miR-25-3p	DNAJB9	DnaJ heat shock protein family (Hsp40) member B9
Details	22	98	hsa-miR-25-3p	EFR3A	EFR3 homolog A
Details	23	98	hsa-miR-25-3p	BTG2	BTG anti-proliferation factor 2
Details	24	97	hsa-miR-25-3p	GTF2A1	general transcription factor IIA subunit 1
Details	25	97	hsa-miR-25-3p	ZFC3H1	zinc finger C3H1-type containing
Details	26	97	hsa-miR-25-3p	UGP2	UDP-glucose pyrophosphorylase 2
Details	27	97	hsa-miR-25-3p	KLHL14	kelch like family member 14
Details	28	97	hsa-miR-25-3p	FNIP2	folliculin interacting protein 2
Details	29	97	hsa-miR-25-3p	LHFPL2	LHFPL tetraspan subfamily member 2
Details	30	97	hsa-miR-25-3p	SYN2	synapsin II
Details	31	97	hsa-miR-25-3p	USP28	ubiquitin specific peptidase 28
Details	32	97	hsa-miR-25-3p	SCN8A	sodium voltage-gated channel alpha subunit 8
Details	33	97	hsa-miR-25-3p	DCAF6	DDB1 and CUL4 associated factor 6
Details	34	97	hsa-miR-25-3p	CDK16	cyclin dependent kinase 16
Details	35	97	hsa-miR-25-3p	GPR180	G protein-coupled receptor 180
Details	36	97	hsa-miR-25-3p	GOLGA3	golgin A3
Details	37	97	hsa-miR-25-3p	MORC3	MORC family CW-type zinc finger 3
Details	38	97	hsa-miR-25-3p	NCKAP5	NCK associated protein 5
Details	39	96	hsa-miR-25-3p	PLEKHA1	pleckstrin homology domain containing A1
Details	40	96	hsa-miR-25-3p	SLC25A32	solute carrier family 25 member 32
Details	41	96	hsa-miR-25-3p	PTAR1	protein prenyltransferase alpha subunit repeat containing 1
Details	42	96	hsa-miR-25-3p	SNX13	sorting nexin 13
Details	43	96	hsa-miR-25-3p	NSF	N-ethylmaleimide sensitive factor, vesicle fusing ATPase
Details	44	96	hsa-miR-25-3p	MIER1	MIER1 transcriptional regulator
Details	45	96	hsa-miR-25-3p	NEFM	neurofilament medium
Details	46	96	hsa-miR-25-3p	FAM160B1	family with sequence similarity 160 member B1
Details	47	96	hsa-miR-25-3p	CDCA7L	cell division cycle associated 7 like
Details	48	96	hsa-miR-25-3p	COG3	component of oligomeric golgi complex 3
Details	49	96	hsa-miR-25-3p	BCL11B	BCL11B, BAF complex component
Details	50	96	hsa-miR-25-3p	GNAQ	G protein subunit alpha q
Details	51	96	hsa-miR-25-3p	HAND2	heart and neural crest derivatives expressed 2
Details	52	96	hsa-miR-25-3p	MAGEC2	MAGE family member C2
Details	53	96	hsa-miR-25-3p	DENND1B	DENN domain containing 1B
Details	54	96	hsa-miR-25-3p	EDEM1	ER degradation enhancing alpha-mannosidase like protein 1
Details	55	96	hsa-miR-25-3p	NOX4	NADPH oxidase 4
Details	56	95	hsa-miR-25-3p	MIA3	MIA SH3 domain ER export factor 3
Details	57	95	hsa-miR-25-3p	CADM2	cell adhesion molecule 2
Details	58	95	hsa-miR-25-3p	PPCS	phosphopantothenoylcysteine synthetase
Details	59	95	hsa-miR-25-3p	PCDH11X	protocadherin 11 X-linked
Details	60	95	hsa-miR-25-3p	CPEB3	cytoplasmic polyadenylation element binding protein 3
Details	61	95	hsa-miR-25-3p	ADAM10	ADAM metallopeptidase domain 10
Details	62	95	hsa-miR-25-3p	HIVEP1	human immunodeficiency virus type I enhancer binding protein 1
Details	63	95	hsa-miR-25-3p	GID4	GID complex subunit 4 homolog
Details	64	95	hsa-miR-25-3p	ZEB2	zinc finger E-box binding homeobox 2
Details	65	95	hsa-miR-25-3p	HCN2	hyperpolarization activated cyclic nucleotide gated potassium and sodium channel 2
Details	66	95	hsa-miR-25-3p	CLDN11	claudin 11
Details	67	95	hsa-miR-25-3p	BCL2L11	BCL2 like 11
Details	68	95	hsa-miR-25-3p	DPP10	dipeptidyl peptidase like 10
Details	69	95	hsa-miR-25-3p	SYNJ1	synaptojanin 1
Details	70	95	hsa-miR-25-3p	USP36	ubiquitin specific peptidase 36
Details	71	95	hsa-miR-25-3p	TEAD1	TEA domain transcription factor 1
Details	72	95	hsa-miR-25-3p	RGS17	regulator of G protein signaling 17
Details	73	95	hsa-miR-25-3p	SESN3	sestrin 3
Details	74	95	hsa-miR-25-3p	UBXN4	UBX domain protein 4
Details	75	95	hsa-miR-25-3p	KIAA1109	KIAA1109
Details	76	95	hsa-miR-25-3p	RSBN1	round spermatid basic protein 1
Details	77	95	hsa-miR-25-3p	ZFAND1	zinc finger AN1-type containing 1
Details	78	95	hsa-miR-25-3p	ARID1B	AT-rich interaction domain 1B
Details	79	95	hsa-miR-25-3p	RHPN2	rhophilin Rho GTPase binding protein 2
Details	80	95	hsa-miR-25-3p	PTEN	phosphatase and tensin homolog
Details	81	94	hsa-miR-25-3p	ITPR1	inositol 1,4,5-trisphosphate receptor type 1
Details	82	94	hsa-miR-25-3p	MYO5A	myosin VA
Details	83	94	hsa-miR-25-3p	RBM27	RNA binding motif protein 27
Details	84	94	hsa-miR-25-3p	ANKRD28	ankyrin repeat domain 28
Details	85	94	hsa-miR-25-3p	TTC9	tetratricopeptide repeat domain 9
Details	86	94	hsa-miR-25-3p	PIAS4	protein inhibitor of activated STAT 4
Details	87	94	hsa-miR-25-3p	ERGIC2	ERGIC and golgi 2
Details	88	94	hsa-miR-25-3p	IQGAP2	IQ motif containing GTPase activating protein 2
Details	89	94	hsa-miR-25-3p	TRIM36	tripartite motif containing 36
Details	90	94	hsa-miR-25-3p	CUX1	cut like homeobox 1
Details	91	94	hsa-miR-25-3p	LRCH1	leucine rich repeats and calponin homology domain containing 1
Details	92	94	hsa-miR-25-3p	REST	RE1 silencing transcription factor
Details	93	94	hsa-miR-25-3p	FOXN2	forkhead box N2
Details	94	94	hsa-miR-25-3p	SPRYD4	SPRY domain containing 4
Details	95	94	hsa-miR-25-3p	LATS2	large tumor suppressor kinase 2
Details	96	94	hsa-miR-25-3p	NEFH	neurofilament heavy
Details	97	94	hsa-miR-25-3p	MAP1B	microtubule associated protein 1B
Details	98	94	hsa-miR-25-3p	GRHL1	grainyhead like transcription factor 1
Details	99	94	hsa-miR-25-3p	APPL1	adaptor protein, phosphotyrosine interacting with PH domain and leucine zipper 1
Details	100	94	hsa-miR-25-3p	ZFYVE21	zinc finger FYVE-type containing 21
Details	101	94	hsa-miR-25-3p	NR4A3	nuclear receptor subfamily 4 group A member 3
Details	102	94	hsa-miR-25-3p	TWF1	twinfilin actin binding protein 1
Details	103	94	hsa-miR-25-3p	ITGA6	integrin subunit alpha 6
Details	104	94	hsa-miR-25-3p	ITGA8	integrin subunit alpha 8
Details	105	94	hsa-miR-25-3p	CBLN4	cerebellin 4 precursor
Details	106	94	hsa-miR-25-3p	CCNJL	cyclin J like
Details	107	94	hsa-miR-25-3p	FZD10	frizzled class receptor 10
Details	108	94	hsa-miR-25-3p	RNF38	ring finger protein 38
Details	109	94	hsa-miR-25-3p	SLX4	SLX4 structure-specific endonuclease subunit
Details	110	94	hsa-miR-25-3p	PAX9	paired box 9
Details	111	94	hsa-miR-25-3p	ANP32E	acidic nuclear phosphoprotein 32 family member E
Details	112	94	hsa-miR-25-3p	ADGRF2	adhesion G protein-coupled receptor F2
Details	113	94	hsa-miR-25-3p	PIK3R3	phosphoinositide-3-kinase regulatory subunit 3
Details	114	94	hsa-miR-25-3p	ACTC1	actin, alpha, cardiac muscle 1
Details	115	94	hsa-miR-25-3p	RGL1	ral guanine nucleotide dissociation stimulator like 1
Details	116	93	hsa-miR-25-3p	MPP1	membrane palmitoylated protein 1
Details	117	93	hsa-miR-25-3p	PIK3CB	phosphatidylinositol-4,5-bisphosphate 3-kinase catalytic subunit beta
Details	118	93	hsa-miR-25-3p	CPEB2	cytoplasmic polyadenylation element binding protein 2
Details	119	93	hsa-miR-25-3p	TEF	TEF, PAR bZIP transcription factor
Details	120	93	hsa-miR-25-3p	FAM24A	family with sequence similarity 24 member A
Details	121	93	hsa-miR-25-3p	MTF1	metal regulatory transcription factor 1
Details	122	93	hsa-miR-25-3p	SOSTDC1	sclerostin domain containing 1
Details	123	93	hsa-miR-25-3p	JMY	junction mediating and regulatory protein, p53 cofactor
Details	124	93	hsa-miR-25-3p	SGK3	serum/glucocorticoid regulated kinase family member 3
Details	125	93	hsa-miR-25-3p	AGO3	argonaute RISC catalytic component 3
Details	126	93	hsa-miR-25-3p	EOMES	eomesodermin
Details	127	93	hsa-miR-25-3p	TECPR2	tectonin beta-propeller repeat containing 2
Details	128	93	hsa-miR-25-3p	COL27A1	collagen type XXVII alpha 1 chain
Details	129	93	hsa-miR-25-3p	ARMC1	armadillo repeat containing 1
Details	130	93	hsa-miR-25-3p	NKX2-3	NK2 homeobox 3
Details	131	93	hsa-miR-25-3p	GLYR1	glyoxylate reductase 1 homolog
Details	132	93	hsa-miR-25-3p	ST6GAL2	ST6 beta-galactoside alpha-2,6-sialyltransferase 2
Details	133	93	hsa-miR-25-3p	EPG5	ectopic P-granules autophagy protein 5 homolog
Details	134	93	hsa-miR-25-3p	TBL1XR1	transducin beta like 1 X-linked receptor 1
Details	135	93	hsa-miR-25-3p	UBE2Z	ubiquitin conjugating enzyme E2 Z
Details	136	93	hsa-miR-25-3p	TENT4A	terminal nucleotidyltransferase 4A
Details	137	93	hsa-miR-25-3p	TMF1	TATA element modulatory factor 1
Details	138	93	hsa-miR-25-3p	TAGAP	T cell activation RhoGTPase activating protein
Details	139	93	hsa-miR-25-3p	MMP10	matrix metallopeptidase 10
Details	140	93	hsa-miR-25-3p	NPC1	NPC intracellular cholesterol transporter 1
Details	141	93	hsa-miR-25-3p	MOAP1	modulator of apoptosis 1
Details	142	93	hsa-miR-25-3p	PITPNA	phosphatidylinositol transfer protein alpha
Details	143	93	hsa-miR-25-3p	ADAMTSL1	ADAMTS like 1
Details	144	93	hsa-miR-25-3p	IDH1	isocitrate dehydrogenase (NADP(+)) 1, cytosolic
Details	145	93	hsa-miR-25-3p	CALN1	calneuron 1
Details	146	93	hsa-miR-25-3p	ATXN1	ataxin 1
Details	147	93	hsa-miR-25-3p	CACNA1I	calcium voltage-gated channel subunit alpha1 I
Details	148	92	hsa-miR-25-3p	ATG14	autophagy related 14
Details	149	92	hsa-miR-25-3p	SGPP1	sphingosine-1-phosphate phosphatase 1
Details	150	92	hsa-miR-25-3p	DYRK2	dual specificity tyrosine phosphorylation regulated kinase 2
Details	151	92	hsa-miR-25-3p	ADAMTSL3	ADAMTS like 3
Details	152	92	hsa-miR-25-3p	ZDHHC5	zinc finger DHHC-type containing 5
Details	153	92	hsa-miR-25-3p	C8orf44-SGK3	C8orf44-SGK3 readthrough
Details	154	92	hsa-miR-25-3p	ESRP1	epithelial splicing regulatory protein 1
Details	155	92	hsa-miR-25-3p	ADAM19	ADAM metallopeptidase domain 19
Details	156	92	hsa-miR-25-3p	PDZD2	PDZ domain containing 2
Details	157	92	hsa-miR-25-3p	PRKAR2B	protein kinase cAMP-dependent type II regulatory subunit beta
Details	158	92	hsa-miR-25-3p	TEX2	testis expressed 2
Details	159	92	hsa-miR-25-3p	NEFL	neurofilament light
Details	160	92	hsa-miR-25-3p	UBE2W	ubiquitin conjugating enzyme E2 W
Details	161	92	hsa-miR-25-3p	GFPT2	glutamine-fructose-6-phosphate transaminase 2
Details	162	92	hsa-miR-25-3p	PCOLCE2	procollagen C-endopeptidase enhancer 2
Details	163	92	hsa-miR-25-3p	SSBP2	single stranded DNA binding protein 2
Details	164	92	hsa-miR-25-3p	GLCE	glucuronic acid epimerase
Details	165	92	hsa-miR-25-3p	FNBP4	formin binding protein 4
Details	166	92	hsa-miR-25-3p	PAX3	paired box 3
Details	167	92	hsa-miR-25-3p	FHL2	four and a half LIM domains 2
Details	168	92	hsa-miR-25-3p	SNN	stannin
Details	169	92	hsa-miR-25-3p	SLC10A7	solute carrier family 10 member 7
Details	170	92	hsa-miR-25-3p	COX20	cytochrome c oxidase assembly factor COX20
Details	171	92	hsa-miR-25-3p	GIT2	GIT ArfGAP 2
Details	172	91	hsa-miR-25-3p	ITPRID2	ITPR interacting domain containing 2
Details	173	91	hsa-miR-25-3p	RNF180	ring finger protein 180
Details	174	91	hsa-miR-25-3p	WWP2	WW domain containing E3 ubiquitin protein ligase 2
Details	175	91	hsa-miR-25-3p	ATXN3	ataxin 3
Details	176	91	hsa-miR-25-3p	OTUD4	OTU deubiquitinase 4
Details	177	91	hsa-miR-25-3p	FMN2	formin 2
Details	178	91	hsa-miR-25-3p	TOB1	transducer of ERBB2, 1
Details	179	91	hsa-miR-25-3p	ALKAL2	ALK and LTK ligand 2
Details	180	91	hsa-miR-25-3p	SRPRA	SRP receptor subunit alpha
Details	181	91	hsa-miR-25-3p	SOX11	SRY-box 11
Details	182	91	hsa-miR-25-3p	STRN3	striatin 3
Details	183	91	hsa-miR-25-3p	KBTBD8	kelch repeat and BTB domain containing 8
Details	184	91	hsa-miR-25-3p	ITGA5	integrin subunit alpha 5
Details	185	91	hsa-miR-25-3p	ANO8	anoctamin 8
Details	186	91	hsa-miR-25-3p	SLC39A8	solute carrier family 39 member 8
Details	187	91	hsa-miR-25-3p	FAM20C	FAM20C, golgi associated secretory pathway kinase
Details	188	91	hsa-miR-25-3p	PCDH7	protocadherin 7
Details	189	91	hsa-miR-25-3p	PHLPP2	PH domain and leucine rich repeat protein phosphatase 2
Details	190	91	hsa-miR-25-3p	APBB2	amyloid beta precursor protein binding family B member 2
Details	191	91	hsa-miR-25-3p	PTPRD	protein tyrosine phosphatase, receptor type D
Details	192	90	hsa-miR-25-3p	SLC24A3	solute carrier family 24 member 3
Details	193	90	hsa-miR-25-3p	ADRB1	adrenoceptor beta 1
Details	194	90	hsa-miR-25-3p	SH3PXD2A	SH3 and PX domains 2A
Details	195	90	hsa-miR-25-3p	KAT2B	lysine acetyltransferase 2B
Details	196	90	hsa-miR-25-3p	TET2	tet methylcytosine dioxygenase 2
Details	197	90	hsa-miR-25-3p	ZNF521	zinc finger protein 521
Details	198	90	hsa-miR-25-3p	ZNF24	zinc finger protein 24
Details	199	90	hsa-miR-25-3p	ARRDC3	arrestin domain containing 3
Details	200	90	hsa-miR-25-3p	PALLD	palladin, cytoskeletal associated protein
Details	201	90	hsa-miR-25-3p	SCUBE3	signal peptide, CUB domain and EGF like domain containing 3
Details	202	90	hsa-miR-25-3p	SNAPC1	small nuclear RNA activating complex polypeptide 1
Details	203	90	hsa-miR-25-3p	DUSP5	dual specificity phosphatase 5
Details	204	90	hsa-miR-25-3p	MEF2D	myocyte enhancer factor 2D
Details	205	90	hsa-miR-25-3p	CIC	capicua transcriptional repressor
Details	206	90	hsa-miR-25-3p	PPP1R37	protein phosphatase 1 regulatory subunit 37
Details	207	90	hsa-miR-25-3p	ANKRD44	ankyrin repeat domain 44
Details	208	90	hsa-miR-25-3p	ROBO2	roundabout guidance receptor 2
Details	209	90	hsa-miR-25-3p	ADCY3	adenylate cyclase 3
Details	210	90	hsa-miR-25-3p	C20orf194	chromosome 20 open reading frame 194
Details	211	90	hsa-miR-25-3p	PCGF3	polycomb group ring finger 3
Details	212	90	hsa-miR-25-3p	KLHL15	kelch like family member 15
Details	213	90	hsa-miR-25-3p	TMEM229A	transmembrane protein 229A
Details	214	90	hsa-miR-25-3p	PCDH11Y	protocadherin 11 Y-linked
Details	215	90	hsa-miR-25-3p	OSBPL5	oxysterol binding protein like 5
Details	216	90	hsa-miR-25-3p	GOLGA4	golgin A4
Details	217	90	hsa-miR-25-3p	BCL11A	BCL11A, BAF complex component
Details	218	90	hsa-miR-25-3p	CXCL5	C-X-C motif chemokine ligand 5
Details	219	89	hsa-miR-25-3p	RNF141	ring finger protein 141
Details	220	89	hsa-miR-25-3p	C11orf24	chromosome 11 open reading frame 24
Details	221	89	hsa-miR-25-3p	PTPRJ	protein tyrosine phosphatase, receptor type J
Details	222	89	hsa-miR-25-3p	DENND4B	DENN domain containing 4B
Details	223	89	hsa-miR-25-3p	CNEP1R1	CTD nuclear envelope phosphatase 1 regulatory subunit 1
Details	224	89	hsa-miR-25-3p	PNISR	PNN interacting serine and arginine rich protein
Details	225	89	hsa-miR-25-3p	MAST4	microtubule associated serine/threonine kinase family member 4
Details	226	89	hsa-miR-25-3p	TCF21	transcription factor 21
Details	227	89	hsa-miR-25-3p	HNF1B	HNF1 homeobox B
Details	228	89	hsa-miR-25-3p	HERPUD2	HERPUD family member 2
Details	229	89	hsa-miR-25-3p	TGIF1	TGFB induced factor homeobox 1
Details	230	89	hsa-miR-25-3p	PEAK1	pseudopodium enriched atypical kinase 1
Details	231	89	hsa-miR-25-3p	TULP4	tubby like protein 4
Details	232	89	hsa-miR-25-3p	RANBP9	RAN binding protein 9
Details	233	89	hsa-miR-25-3p	BSDC1	BSD domain containing 1
Details	234	89	hsa-miR-25-3p	DDX3X	DEAD-box helicase 3 X-linked
Details	235	89	hsa-miR-25-3p	TOB2	transducer of ERBB2, 2
Details	236	89	hsa-miR-25-3p	YIPF4	Yip1 domain family member 4
Details	237	89	hsa-miR-25-3p	GATA2	GATA binding protein 2
Details	238	89	hsa-miR-25-3p	MED19	mediator complex subunit 19
Details	239	89	hsa-miR-25-3p	RAB3C	RAB3C, member RAS oncogene family
Details	240	89	hsa-miR-25-3p	SCAF11	SR-related CTD associated factor 11
Details	241	89	hsa-miR-25-3p	PHTF2	putative homeodomain transcription factor 2
Details	242	89	hsa-miR-25-3p	KLHDC10	kelch domain containing 10
Details	243	89	hsa-miR-25-3p	PTGER4	prostaglandin E receptor 4
Details	244	89	hsa-miR-25-3p	NF2	neurofibromin 2
Details	245	89	hsa-miR-25-3p	PCMTD1	protein-L-isoaspartate (D-aspartate) O-methyltransferase domain containing 1
Details	246	89	hsa-miR-25-3p	LMBR1L	limb development membrane protein 1 like
Details	247	89	hsa-miR-25-3p	SLC38A2	solute carrier family 38 member 2
Details	248	89	hsa-miR-25-3p	PLEKHB2	pleckstrin homology domain containing B2
Details	249	89	hsa-miR-25-3p	DAAM1	dishevelled associated activator of morphogenesis 1
Details	250	89	hsa-miR-25-3p	PDE10A	phosphodiesterase 10A
Details	251	89	hsa-miR-25-3p	C5orf30	chromosome 5 open reading frame 30
Details	252	89	hsa-miR-25-3p	RIMS2	regulating synaptic membrane exocytosis 2
Details	253	89	hsa-miR-25-3p	ZNF721	zinc finger protein 721
Details	254	88	hsa-miR-25-3p	RNF44	ring finger protein 44
Details	255	88	hsa-miR-25-3p	SPTBN4	spectrin beta, non-erythrocytic 4
Details	256	88	hsa-miR-25-3p	COL19A1	collagen type XIX alpha 1 chain
Details	257	88	hsa-miR-25-3p	RPL15	ribosomal protein L15
Details	258	88	hsa-miR-25-3p	PTPRK	protein tyrosine phosphatase, receptor type K
Details	259	88	hsa-miR-25-3p	XPNPEP3	X-prolyl aminopeptidase 3
Details	260	88	hsa-miR-25-3p	PPP1R12A	protein phosphatase 1 regulatory subunit 12A
Details	261	88	hsa-miR-25-3p	FAM126B	family with sequence similarity 126 member B
Details	262	88	hsa-miR-25-3p	PPP1R12C	protein phosphatase 1 regulatory subunit 12C
Details	263	88	hsa-miR-25-3p	NSMF	NMDA receptor synaptonuclear signaling and neuronal migration factor
Details	264	88	hsa-miR-25-3p	JOSD1	Josephin domain containing 1
Details	265	88	hsa-miR-25-3p	SLC32A1	solute carrier family 32 member 1
Details	266	88	hsa-miR-25-3p	ATRX	ATRX, chromatin remodeler
Details	267	88	hsa-miR-25-3p	SLC7A11	solute carrier family 7 member 11
Details	268	88	hsa-miR-25-3p	MTMR9	myotubularin related protein 9
Details	269	88	hsa-miR-25-3p	UBASH3B	ubiquitin associated and SH3 domain containing B
Details	270	88	hsa-miR-25-3p	RPS6KA4	ribosomal protein S6 kinase A4
Details	271	88	hsa-miR-25-3p	SLC25A36	solute carrier family 25 member 36
Details	272	88	hsa-miR-25-3p	GATA6	GATA binding protein 6
Details	273	88	hsa-miR-25-3p	SOX4	SRY-box 4
Details	274	88	hsa-miR-25-3p	DUS2	dihydrouridine synthase 2
Details	275	88	hsa-miR-25-3p	SH3D19	SH3 domain containing 19
Details	276	88	hsa-miR-25-3p	RNF4	ring finger protein 4
Details	277	88	hsa-miR-25-3p	SLC9A7	solute carrier family 9 member A7
Details	278	87	hsa-miR-25-3p	EVI5	ecotropic viral integration site 5
Details	279	87	hsa-miR-25-3p	RGS3	regulator of G protein signaling 3
Details	280	87	hsa-miR-25-3p	SLC25A16	solute carrier family 25 member 16
Details	281	87	hsa-miR-25-3p	GPR158	G protein-coupled receptor 158
Details	282	87	hsa-miR-25-3p	BCAT2	branched chain amino acid transaminase 2
Details	283	87	hsa-miR-25-3p	WASL	Wiskott-Aldrich syndrome like
Details	284	87	hsa-miR-25-3p	TBC1D8	TBC1 domain family member 8
Details	285	87	hsa-miR-25-3p	SOCS6	suppressor of cytokine signaling 6
Details	286	87	hsa-miR-25-3p	PAXBP1	PAX3 and PAX7 binding protein 1
Details	287	87	hsa-miR-25-3p	DUSP10	dual specificity phosphatase 10
Details	288	87	hsa-miR-25-3p	ACOX1	acyl-CoA oxidase 1
Details	289	87	hsa-miR-25-3p	ZC2HC1A	zinc finger C2HC-type containing 1A
Details	290	87	hsa-miR-25-3p	PGBD2	piggyBac transposable element derived 2
Details	291	87	hsa-miR-25-3p	RAB14	RAB14, member RAS oncogene family
Details	292	87	hsa-miR-25-3p	NKX2-4	NK2 homeobox 4
Details	293	86	hsa-miR-25-3p	PCYT1B	phosphate cytidylyltransferase 1, choline, beta
Details	294	86	hsa-miR-25-3p	MAP3K20	mitogen-activated protein kinase kinase kinase 20
Details	295	86	hsa-miR-25-3p	P3H3	prolyl 3-hydroxylase 3
Details	296	86	hsa-miR-25-3p	SNAP91	synaptosome associated protein 91
Details	297	86	hsa-miR-25-3p	TNPO1	transportin 1
Details	298	86	hsa-miR-25-3p	RBM47	RNA binding motif protein 47
Details	299	86	hsa-miR-25-3p	CBFA2T3	CBFA2/RUNX1 translocation partner 3
Details	300	86	hsa-miR-25-3p	ZNF595	zinc finger protein 595
Details	301	86	hsa-miR-25-3p	C19orf12	chromosome 19 open reading frame 12
Details	302	86	hsa-miR-25-3p	NSMAF	neutral sphingomyelinase activation associated factor
Details	303	86	hsa-miR-25-3p	GRAMD2B	GRAM domain containing 2B
Details	304	86	hsa-miR-25-3p	PDZD8	PDZ domain containing 8
Details	305	86	hsa-miR-25-3p	PSMD14	proteasome 26S subunit, non-ATPase 14
Details	306	86	hsa-miR-25-3p	ARF1	ADP ribosylation factor 1
Details	307	86	hsa-miR-25-3p	COL1A2	collagen type I alpha 2 chain
Details	308	86	hsa-miR-25-3p	ZNF827	zinc finger protein 827
Details	309	86	hsa-miR-25-3p	RORA	RAR related orphan receptor A
Details	310	86	hsa-miR-25-3p	MSR1	macrophage scavenger receptor 1
Details	311	86	hsa-miR-25-3p	IBTK	inhibitor of Bruton tyrosine kinase
Details	312	86	hsa-miR-25-3p	CNIH1	cornichon family AMPA receptor auxiliary protein 1
Details	313	86	hsa-miR-25-3p	ZFHX4	zinc finger homeobox 4
Details	314	86	hsa-miR-25-3p	CHCHD10	coiled-coil-helix-coiled-coil-helix domain containing 10
Details	315	86	hsa-miR-25-3p	BAZ2B	bromodomain adjacent to zinc finger domain 2B
Details	316	86	hsa-miR-25-3p	KMT5B	lysine methyltransferase 5B
Details	317	86	hsa-miR-25-3p	SERTAD3	SERTA domain containing 3
Details	318	86	hsa-miR-25-3p	RFX1	regulatory factor X1
Details	319	86	hsa-miR-25-3p	TPPP	tubulin polymerization promoting protein
Details	320	86	hsa-miR-25-3p	HS3ST5	heparan sulfate-glucosamine 3-sulfotransferase 5
Details	321	86	hsa-miR-25-3p	EDEM3	ER degradation enhancing alpha-mannosidase like protein 3
Details	322	86	hsa-miR-25-3p	PKDCC	protein kinase domain containing, cytoplasmic
Details	323	86	hsa-miR-25-3p	PITPNM2	phosphatidylinositol transfer protein membrane associated 2
Details	324	86	hsa-miR-25-3p	SLC4A8	solute carrier family 4 member 8
Details	325	86	hsa-miR-25-3p	DDX3Y	DEAD-box helicase 3 Y-linked
Details	326	86	hsa-miR-25-3p	FRY	FRY microtubule binding protein
Details	327	85	hsa-miR-25-3p	SEMA3A	semaphorin 3A
Details	328	85	hsa-miR-25-3p	MFHAS1	malignant fibrous histiocytoma amplified sequence 1
Details	329	85	hsa-miR-25-3p	DSC2	desmocollin 2
Details	330	85	hsa-miR-25-3p	OTUD3	OTU deubiquitinase 3
Details	331	85	hsa-miR-25-3p	MAPK8	mitogen-activated protein kinase 8
Details	332	85	hsa-miR-25-3p	HIPK1	homeodomain interacting protein kinase 1
Details	333	85	hsa-miR-25-3p	FXR1	FMR1 autosomal homolog 1
Details	334	85	hsa-miR-25-3p	AADACL3	arylacetamide deacetylase like 3
Details	335	85	hsa-miR-25-3p	SERINC5	serine incorporator 5
Details	336	85	hsa-miR-25-3p	CELF2	CUGBP Elav-like family member 2
Details	337	85	hsa-miR-25-3p	CPEB4	cytoplasmic polyadenylation element binding protein 4
Details	338	85	hsa-miR-25-3p	PTPRO	protein tyrosine phosphatase, receptor type O
Details	339	85	hsa-miR-25-3p	CCNC	cyclin C
Details	340	85	hsa-miR-25-3p	AIDA	axin interactor, dorsalization associated
Details	341	85	hsa-miR-25-3p	RAD21	RAD21 cohesin complex component
Details	342	85	hsa-miR-25-3p	STYX	serine/threonine/tyrosine interacting protein
Details	343	85	hsa-miR-25-3p	UCHL5	ubiquitin C-terminal hydrolase L5
Details	344	85	hsa-miR-25-3p	VPS4B	vacuolar protein sorting 4 homolog B
Details	345	85	hsa-miR-25-3p	CCDC186	coiled-coil domain containing 186
Details	346	84	hsa-miR-25-3p	LYST	lysosomal trafficking regulator
Details	347	84	hsa-miR-25-3p	NFYB	nuclear transcription factor Y subunit beta
Details	348	84	hsa-miR-25-3p	TACC2	transforming acidic coiled-coil containing protein 2
Details	349	84	hsa-miR-25-3p	ELOVL4	ELOVL fatty acid elongase 4
Details	350	84	hsa-miR-25-3p	2020-03-04	membrane associated ring-CH-type finger 4
Details	351	84	hsa-miR-25-3p	LRRC1	leucine rich repeat containing 1
Details	352	84	hsa-miR-25-3p	DMXL1	Dmx like 1
Details	353	84	hsa-miR-25-3p	SELENOT	selenoprotein T
Details	354	84	hsa-miR-25-3p	REXO1	RNA exonuclease 1 homolog
Details	355	84	hsa-miR-25-3p	FKBP1A	FKBP prolyl isomerase 1A
Details	356	84	hsa-miR-25-3p	CPNE8	copine 8
Details	357	84	hsa-miR-25-3p	MBOAT2	membrane bound O-acyltransferase domain containing 2
Details	358	84	hsa-miR-25-3p	MMD	monocyte to macrophage differentiation associated
Details	359	84	hsa-miR-25-3p	FAM160A2	family with sequence similarity 160 member A2
Details	360	84	hsa-miR-25-3p	INSIG1	insulin induced gene 1
Details	361	84	hsa-miR-25-3p	GPR137C	G protein-coupled receptor 137C
Details	362	84	hsa-miR-25-3p	LIN54	lin-54 DREAM MuvB core complex component
Details	363	83	hsa-miR-25-3p	MYCBP2	MYC binding protein 2, E3 ubiquitin protein ligase
Details	364	83	hsa-miR-25-3p	PLXDC2	plexin domain containing 2
Details	365	83	hsa-miR-25-3p	FAM135A	family with sequence similarity 135 member A
Details	366	83	hsa-miR-25-3p	TMEM255A	transmembrane protein 255A
Details	367	83	hsa-miR-25-3p	ANKIB1	ankyrin repeat and IBR domain containing 1
Details	368	83	hsa-miR-25-3p	PAPSS2	3'-phosphoadenosine 5'-phosphosulfate synthase 2
Details	369	83	hsa-miR-25-3p	LIMCH1	LIM and calponin homology domains 1
Details	370	83	hsa-miR-25-3p	GPC6	glypican 6
Details	371	83	hsa-miR-25-3p	MCL1	MCL1, BCL2 family apoptosis regulator
Details	372	83	hsa-miR-25-3p	RAB8B	RAB8B, member RAS oncogene family
Details	373	83	hsa-miR-25-3p	NRG1	neuregulin 1
Details	374	82	hsa-miR-25-3p	ASPN	asporin
Details	375	82	hsa-miR-25-3p	PER2	period circadian regulator 2
Details	376	82	hsa-miR-25-3p	BAHCC1	BAH domain and coiled-coil containing 1
Details	377	82	hsa-miR-25-3p	ATP6V1B2	ATPase H+ transporting V1 subunit B2
Details	378	82	hsa-miR-25-3p	CLCN5	chloride voltage-gated channel 5
Details	379	82	hsa-miR-25-3p	NCAPH2	non-SMC condensin II complex subunit H2
Details	380	82	hsa-miR-25-3p	TRIO	trio Rho guanine nucleotide exchange factor
Details	381	82	hsa-miR-25-3p	KLF8	Kruppel like factor 8
Details	382	82	hsa-miR-25-3p	TBC1D12	TBC1 domain family member 12
Details	383	82	hsa-miR-25-3p	CDH10	cadherin 10
Details	384	82	hsa-miR-25-3p	MINAR1	membrane integral NOTCH2 associated receptor 1
Details	385	82	hsa-miR-25-3p	AFF3	AF4/FMR2 family member 3
Details	386	82	hsa-miR-25-3p	LONRF3	LON peptidase N-terminal domain and ring finger 3
Details	387	82	hsa-miR-25-3p	ABHD13	abhydrolase domain containing 13
Details	388	82	hsa-miR-25-3p	FAM19A1	family with sequence similarity 19 member A1, C-C motif chemokine like
Details	389	82	hsa-miR-25-3p	GOLGA1	golgin A1
Details	390	82	hsa-miR-25-3p	C5orf24	chromosome 5 open reading frame 24
Details	391	82	hsa-miR-25-3p	CDKL5	cyclin dependent kinase like 5
Details	392	81	hsa-miR-25-3p	GOLGA7	golgin A7
Details	393	81	hsa-miR-25-3p	KLF2	Kruppel like factor 2
Details	394	81	hsa-miR-25-3p	ZNF385D	zinc finger protein 385D
Details	395	81	hsa-miR-25-3p	NUFIP2	nuclear FMR1 interacting protein 2
Details	396	81	hsa-miR-25-3p	DNAJB12	DnaJ heat shock protein family (Hsp40) member B12
Details	397	81	hsa-miR-25-3p	MFF	mitochondrial fission factor
Details	398	81	hsa-miR-25-3p	NPNT	nephronectin
Details	399	81	hsa-miR-25-3p	PRRC2B	proline rich coiled-coil 2B
Details	400	81	hsa-miR-25-3p	CTTNBP2	cortactin binding protein 2
Details	401	81	hsa-miR-25-3p	SLC9A1	solute carrier family 9 member A1
Details	402	81	hsa-miR-25-3p	LUZP1	leucine zipper protein 1
Details	403	81	hsa-miR-25-3p	ELOA	elongin A
Details	404	81	hsa-miR-25-3p	KLHL29	kelch like family member 29
Details	405	81	hsa-miR-25-3p	BMPR2	bone morphogenetic protein receptor type 2
Details	406	81	hsa-miR-25-3p	PLEKHG3	pleckstrin homology and RhoGEF domain containing G3
Details	407	81	hsa-miR-25-3p	TMEM267	transmembrane protein 267
Details	408	81	hsa-miR-25-3p	GNPDA2	glucosamine-6-phosphate deaminase 2
Details	409	80	hsa-miR-25-3p	NOTCH1	notch 1
Details	410	80	hsa-miR-25-3p	FASLG	Fas ligand
Details	411	80	hsa-miR-25-3p	EPC2	enhancer of polycomb homolog 2
Details	412	80	hsa-miR-25-3p	USP45	ubiquitin specific peptidase 45
Details	413	80	hsa-miR-25-3p	XYLT2	xylosyltransferase 2
Details	414	80	hsa-miR-25-3p	ARHGAP24	Rho GTPase activating protein 24
Details	415	80	hsa-miR-25-3p	ARHGEF17	Rho guanine nucleotide exchange factor 17
Details	416	80	hsa-miR-25-3p	CASD1	CAS1 domain containing 1
Details	417	80	hsa-miR-25-3p	ARRDC4	arrestin domain containing 4
Details	418	80	hsa-miR-25-3p	ZNF287	zinc finger protein 287
Details	419	80	hsa-miR-25-3p	ELK4	ELK4, ETS transcription factor
Details	420	80	hsa-miR-25-3p	2020-03-06	membrane associated ring-CH-type finger 6
Details	421	80	hsa-miR-25-3p	AFF1	AF4/FMR2 family member 1
Details	422	80	hsa-miR-25-3p	TPCN1	two pore segment channel 1
Details	423	80	hsa-miR-25-3p	CCNE2	cyclin E2
Details	424	80	hsa-miR-25-3p	FCHO2	FCH domain only 2
